# Supplementary material for: Cardiac and renal function in a large cohort of amateur marathon runners
Source: PubMed Central journal article supplement (PMC4372316; doi:10.1186/s12947-015-0007-6), 2015-03-21
Supplement: 12947_2015_7_MOESM1_ESM.pdf [file 12947_2015_7_MOESM1_ESM.pdf]

**Additional file 1.** Subgroup analysis of baseline (pre) and post-marathon (post) variables depending on average training before the marathon

| Parameter                                                      | Group I                 | Group II                | Group III               | p inter-group | p intragroup Pre vs. Post |        |        |
|----------------------------------------------------------------|-------------------------|-------------------------|-------------------------|---------------|---------------------------|--------|--------|
|                                                                | ≤ 56 km/wk<br>(n = 102) | 57-72 km/wk<br>(n = 40) | > 72 km/wk<br>(n = 25)  |               | I                         | II     | III    |
| <b>Age</b> [years]                                             | 50.3 ± 10.6             | 48.6 ± 10.7             | 52.9 ± 15.3             | 0.70          |                           |        |        |
| <b>Male</b> (%)                                                | 40 %                    | 42 %                    | 80 %                    |               |                           |        |        |
| <b>Average training</b><br>[km/week]                           | 42.5<br>(35.0-50.0)     | 65.0<br>(60.0-70.0)     | 85.0<br>(80.0-90.0)     | <0.001        |                           |        |        |
| <b>Finishing time</b> [min]                                    | 273.5<br>(249.5-302.0)  | 245.0 (216.0-<br>270.0) | 237.0 (214.0-<br>260.0) | <0.001        |                           |        |        |
| <b>Heart rate</b> [bpm]                                        |                         |                         |                         |               |                           |        |        |
| Pre                                                            | 62.6 ± 8.7              | 60.5 ± 9.6              | 60.4 ± 9.4              |               |                           |        |        |
| Post                                                           | 88.0 ± 12.3             | 89.2 ± 16.5             | 87.7 ± 17.9             | 0.08          | <0.001                    | <0.001 | <0.001 |
| <b>NT-proBNP</b> [pg/ml]                                       |                         |                         |                         |               |                           |        |        |
| Pre                                                            | 70.2<br>(43.1-131.4)    | 73.5<br>(33.9-102.7)    | 78.6<br>(38.3-135.9)    |               |                           |        |        |
| Post                                                           | 146.7<br>(98.6-224.9)   | 107.3<br>(64.8-208.1)   | 128.0<br>(84.0-325.8)   | 0.31          | <0.001                    | <0.001 | <0.001 |
| <b><u>LV SYSTOLIC FUNCTION</u></b>                             |                         |                         |                         |               |                           |        |        |
| <b>MPI</b>                                                     |                         |                         |                         |               |                           |        |        |
| Pre                                                            | 0.47<br>(0.40-0.54)     | 0.46<br>(0.37-0.59)     | 0.46<br>(0.37-0.55)     |               |                           |        |        |
| Post                                                           | 0.47<br>(0.41-0.55)     | 0.50<br>(0.43-0.62)     | 0.46<br>(0.39-0.55)     | 0.36          | 0.23                      | 0.44   | 0.63   |
| <b>Longitudinal 2D strain septal basal (%)</b>                 |                         |                         |                         |               |                           |        |        |
| Pre                                                            | -18.3<br>(15.5-20.4)    | -17.3<br>(15.4-20.3)    | -17.8<br>(15.8-19.6)    |               |                           |        |        |
| Post                                                           | -20.2<br>(16.4-22.7)    | -18.9<br>(16.2-22.9)    | -17.4<br>(15.0-22.9)    | 0.57          | <0.001                    | <0.001 | 0.25   |
| <b>Peak systolic velocity septal basal S'<sup>2</sup>[m/s]</b> |                         |                         |                         |               |                           |        |        |
| Pre                                                            | 0.07<br>(0.07-0.08)     | 0.08<br>(0.07-0.08)     | 0.07<br>(0.07-0.09)     |               |                           |        |        |
| Post                                                           | 0.09<br>(0.08-0.10)     | 0.10<br>(0.09-0.10)     | 0.09<br>(0.08-0.11)     | 0.21          | <0.001                    | <0.001 | 0.001  |

**LV DIASTOLIC FUNCTION****E [m/s]**

|      |                     |                     |                     |      |        |      |       |
|------|---------------------|---------------------|---------------------|------|--------|------|-------|
| Pre  | 0.79<br>(0.67-0.91) | 0.84<br>(0.72-0.94) | 0.75<br>(0.70-0.92) |      |        |      |       |
| Post | 0.66<br>(0.56-0.77) | 0.72<br>(0.58-0.88) | 0.61<br>(0.54-0.75) | 0.38 | <0.001 | 0.01 | 0.011 |

**A [m/s]**

|      |                     |                     |                     |      |        |        |      |
|------|---------------------|---------------------|---------------------|------|--------|--------|------|
| Pre  | 0.61<br>(0.50-0.60) | 0.54<br>(0.48-0.61) | 0.61<br>(0.51-0.71) |      |        |        |      |
| Post | 0.69<br>(0.61-0.83) | 0.70<br>(0.60-0.77) | 0.72<br>(0.51-0.85) | 0.84 | <0.001 | <0.001 | 0.13 |

**E/A**

|      |                     |                     |                     |      |        |        |       |
|------|---------------------|---------------------|---------------------|------|--------|--------|-------|
| Pre  | 1.40<br>(1.01-1.57) | 1.44<br>(1.21-1.89) | 1.20<br>(1.00-1.63) |      |        |        |       |
| Post | 0.90<br>(0.74-1.16) | 1.10<br>(0.80-1.24) | 0.90<br>(0.70-1.14) | 0.71 | <0.001 | <0.001 | 0.022 |

**E/E'**

|      |                      |                      |                      |       |        |        |       |
|------|----------------------|----------------------|----------------------|-------|--------|--------|-------|
| Pre  | 7.73<br>(6.62-9.44)  | 7.83<br>(6.67-8.97)  | 7.56<br>(6.60-10.67) |       |        |        |       |
| Post | 9.04<br>(7.21-10.97) | 9.62<br>(7.83-13.11) | 9.00<br>(5.89-10.86) | 0.02* | <0.001 | <0.001 | 0.672 |

**E' septal [m/s]**

|      |                     |                     |                     |      |       |       |      |
|------|---------------------|---------------------|---------------------|------|-------|-------|------|
| Pre  | 0.10<br>(0.09-0.12) | 0.11<br>(0.09-0.13) | 0.09<br>(0.07-0.11) |      |       |       |      |
| Post | 0.09<br>(0.08-0.11) | 0.09<br>(0.07-0.10) | 0.08<br>(0.07-0.11) | 0.78 | 0.001 | 0.003 | 0.34 |

**A' [m/s]**

|      |                     |                     |                     |      |        |        |      |
|------|---------------------|---------------------|---------------------|------|--------|--------|------|
| Pre  | 0.09<br>(0.08-0.10) | 0.08<br>(0.07-0.10) | 0.08<br>(0.07-0.10) |      |        |        |      |
| Post | 0.11<br>(0.09-0.13) | 0.11<br>(0.09-0.13) | 0.11<br>(0.09-0.14) | 0.41 | <0.001 | <0.001 | 0.16 |

**DT [ms]**

|      |                        |                        |                        |      |        |       |       |
|------|------------------------|------------------------|------------------------|------|--------|-------|-------|
| Pre  | 201.4<br>(149.8-234.8) | 171.5<br>(143.9-228.0) | 155.5<br>(130.5-193.0) |      |        |       |       |
| Post | 126.0<br>(107.0-172.5) | 132.0<br>(104.5-167.1) | 132.0<br>(97.0-155.0)  | 0.90 | <0.001 | 0.001 | 0.006 |

---

**RIGHT HEART PARAMETERS****RVEDD [mm]**

|      |                     |                     |                     |      |              |      |      |
|------|---------------------|---------------------|---------------------|------|--------------|------|------|
| Pre  | 32.0<br>(28.3-37.0) | 33.0<br>(30.0-38.0) | 36.0<br>(30.3-39.8) |      |              |      |      |
| Post | 31.0<br>(28.0-35.0) | 32.0<br>(27.0-35.0) | 33.5<br>(28.3-39.0) | 0.52 | <b>0.025</b> | 0.21 | 0.47 |

**TAPSE [mm]**

|      |                     |                     |                     |      |              |      |      |
|------|---------------------|---------------------|---------------------|------|--------------|------|------|
| Pre  | 28.0<br>(26.0-31.0) | 28.0<br>(26.0-30.0) | 29.5<br>(25.5-31.8) |      |              |      |      |
| Post | 28.0<br>(25.0-29.0) | 28.0<br>(27.0-30.0) | 29.0<br>(25.0-30.0) | 0.21 | <b>0.003</b> | 0.63 | 0.67 |

**RV S' [m/s]**

|      |                     |                     |                     |      |      |      |      |
|------|---------------------|---------------------|---------------------|------|------|------|------|
| Pre  | 0.11<br>(0.10-0.12) | 0.12<br>(0.10-0.14) | 0.11<br>(0.09-0.12) |      |      |      |      |
| Post | 0.11<br>(0.10-0.13) | 0.11<br>(0.08-0.13) | 0.10<br>(0.09-0.13) | 0.26 | 0.18 | 0.08 | 0.84 |

---

\*  $p = 0.53$  for group I vs. II,  $p = 0.02$  for group I vs. III,  $p = 0.02$  for group II vs. III

Values are shown as mean  $\pm$  SD or median (IQR). NT-proBNP, N-terminal prohormone of brain natriuretic peptide; LV, left ventricular; MPI, Myocardial performance index; E, peak transmitral E-wave velocity; A, peak transmitral A-wave velocity; E/A, ratio of transmitral E to transmitral A; E' septal, early diastolic annular velocity measured in the septal annulus; A', late diastolic annular velocity measured in the septal annulus; E/E', ratio of peak early transmitral diastolic velocity to early septal annular velocity; DT, deceleration time of the transmitral E-wave; RV, right ventricular; RVEDD, RV end diastolic diameter; TAPSE, tricuspid annular plane systolic excursion; RV S', peak systolic velocity of the basal RV free wall segment.
